# Supplementary material for: Correlating magnetic anisotropy with [Mo(CN)7]4− geometry of MnII–MoIII magnetic frameworks
Source: Royal Society of Chemistry journal article supplement (doi:10.1039/c9dt02164g), 2019-01-01
Supplement: c9dt02164g1.pdf [file c9dt02164g1.pdf]

# Correlating magnetic anisotropy and $[\text{Mo}(\text{CN})_7]^{4-}$ geometry of $\text{Mn}^{\text{II}}\text{-Mo}^{\text{III}}$ magnetic frameworks

Michał Magott,<sup>a</sup> Kim R. Dunbar,<sup>\*b</sup> Dawid Pinkowicz<sup>\*a</sup>

<sup>a</sup>Jagiellonian University, Gronostajowa 2, 30-348 Kraków, Poland. E-mail: dawid.pinkowicz@uj.edu.pl

<sup>b</sup>Department of Chemistry, Texas A&M University, College Station, Texas 77843, USA. E-mail: dunbar@chem.tamu.edu

## Table of Contents

|                                          |    |
|------------------------------------------|----|
| <b>1. Experimental details</b> .....     | 2  |
| <b>2. IR spectra</b> .....               | 3  |
| <b>3. Powder X-ray diffraction</b> ..... | 5  |
| <b>4. Crystal structures</b> .....       | 6  |
| <b>5. Magnetic properties</b> .....      | 13 |
| <b>References</b> .....                  | 14 |

Correlating magnetic anisotropy with  $[\text{Mo}(\text{CN})_7]^{4-}$  geometry of  $\text{Mn}^{\text{II}}\text{-Mo}^{\text{III}}$  magnetic frameworks

## 1. Experimental details

**Single crystal X-ray diffraction.** Single crystal X-ray diffraction experiments were performed using a Bruker D8 Quest Eco Photon50 CMOS (**1**, **1Re**, **2** and **3**) or Bruker SMART Apex2 (**4**) diffractometer (MoK $\alpha$  radiation, graphite monochromator). Absorption corrections, data reduction and unit cell refinements were performed using the SADABS and SAINT programs included in the Apex3 suite. The structure was solved using direct methods and refined anisotropically using weighted full-matrix least-squares on  $F^2$ .<sup>[S1]</sup> Hydrogen atoms of the ligands were placed in calculated positions and refined as riders on the parent atoms. Structural diagrams were prepared using Mercury CSD 3.9.<sup>[S2]</sup>

CCDC 1899234-1899238 contain the supplementary crystallographic data for this paper which can be obtained free of charge from the Cambridge Crystallographic Data Centre via [www.ccdc.cam.ac.uk/data\\_request/cif](http://www.ccdc.cam.ac.uk/data_request/cif).

**Powder X-ray diffraction.** Powder X-ray diffraction (PXRD) data were obtained at room temperature for ground crystalline samples loaded into glass capillaries with the mother liquor (0.5 mm in diameter). The measurements were carried out using a PANalytical X'Pert Pro MPD diffractometer (CuK $\alpha$  radiation, graphite monochromator).

**Magnetic measurements.** Magnetic susceptibility measurements were performed using a Quantum Design MPMS-3 Evercool magnetometer in magnetic fields up to 7 Tesla for samples packed into glass tubes with a small amount of mother liquor. The experimental data were corrected for the diamagnetism of the sample and the sample holder.

**IR spectra.** IR spectra were recorded using a Nicolet iN10 MX FT-IR microscope in the transmission mode.

## 2. IR spectra

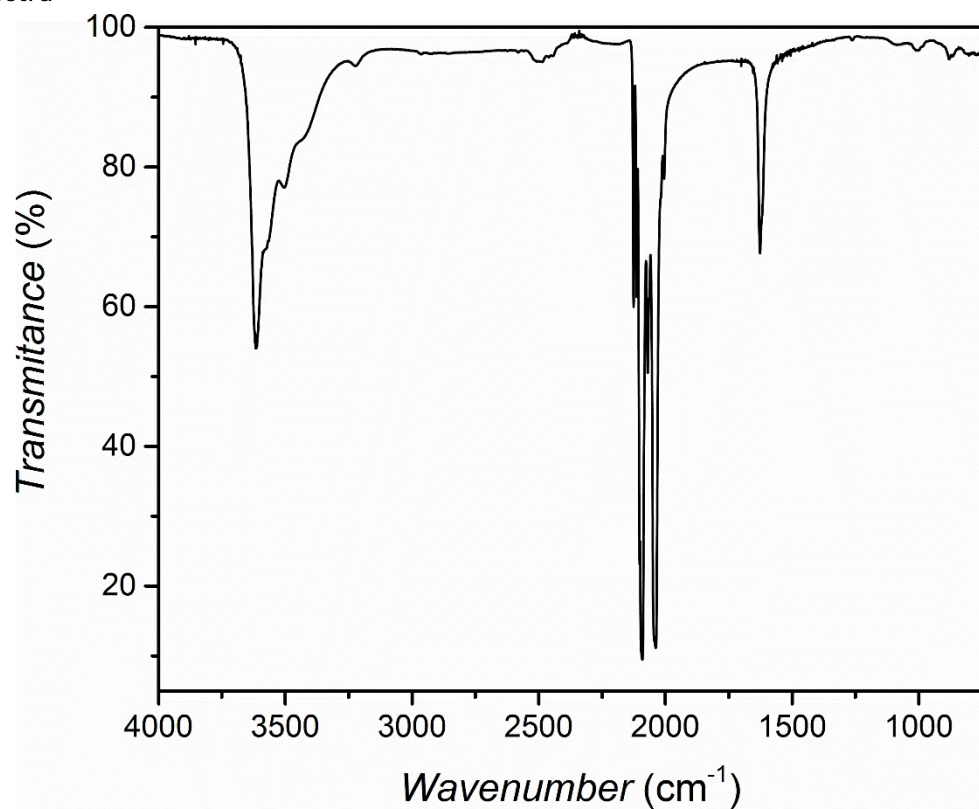

**Figure S1.** IR spectrum of  $K_4[Re^{III}(CN)_7] \cdot 2H_2O$ .

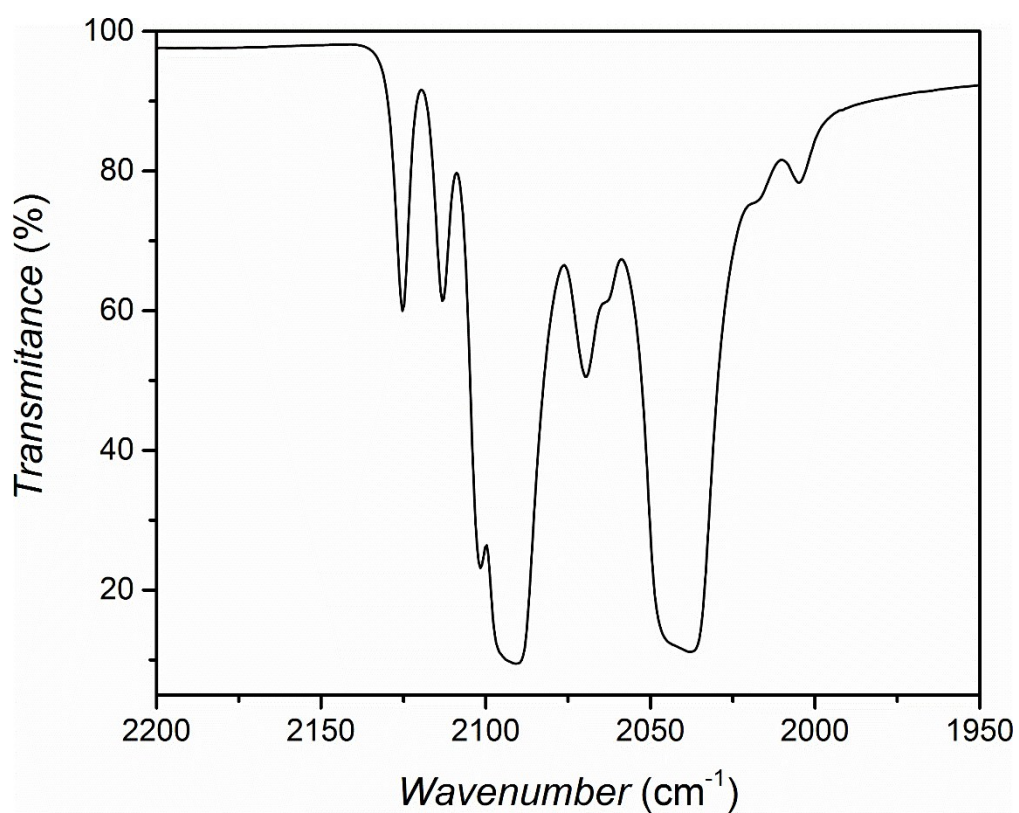

**Figure S2.** IR spectrum of  $K_4[Re^{III}(CN)_7] \cdot 2H_2O$  in the cyanide stretching region.

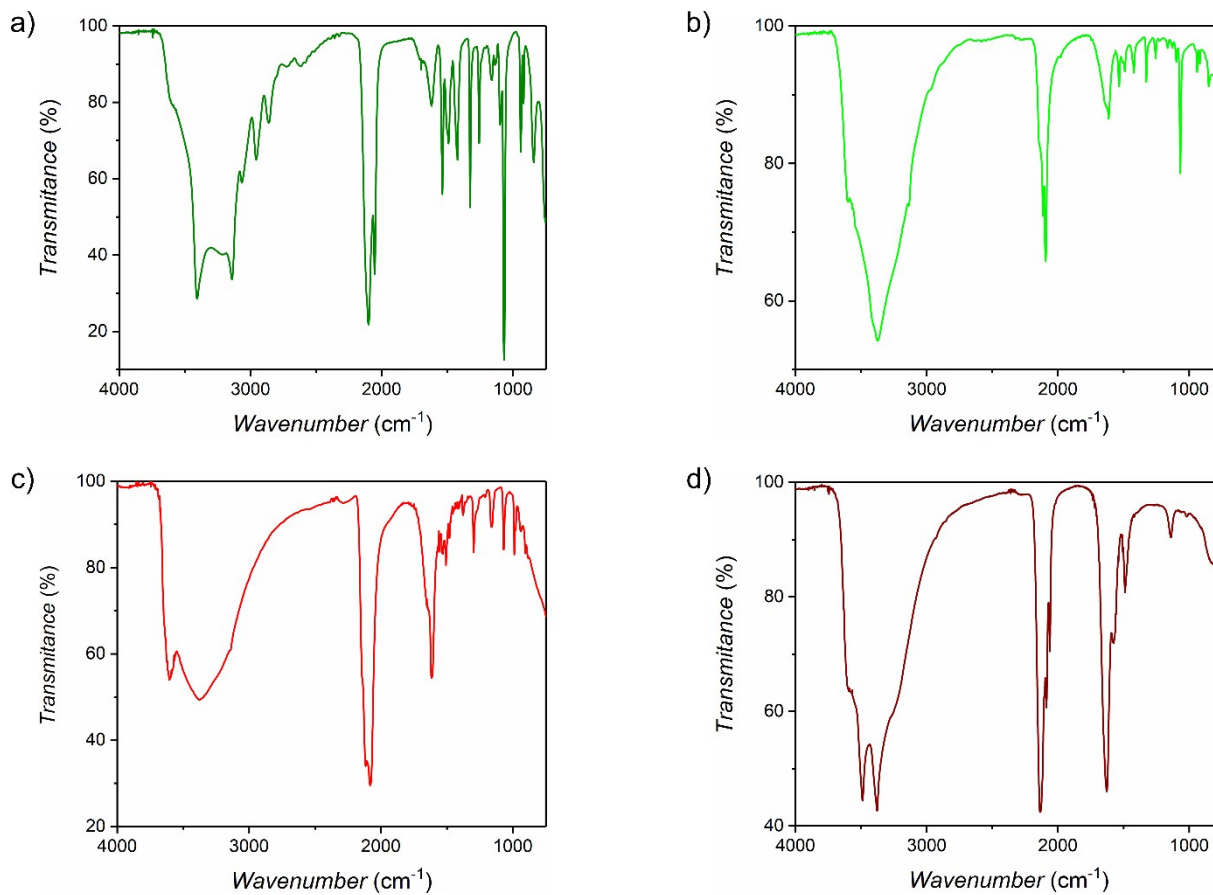

**Figure S3.** IR spectra of compounds **1-4** (a-d respectively).

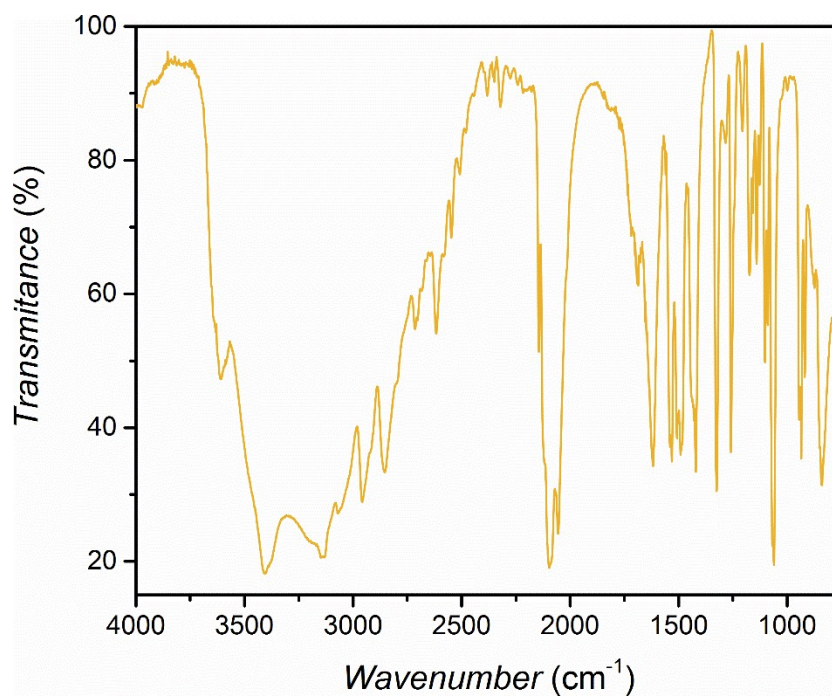

**Figure S4.** IR spectrum of **1Re**.

### 3. Powder X-ray diffraction

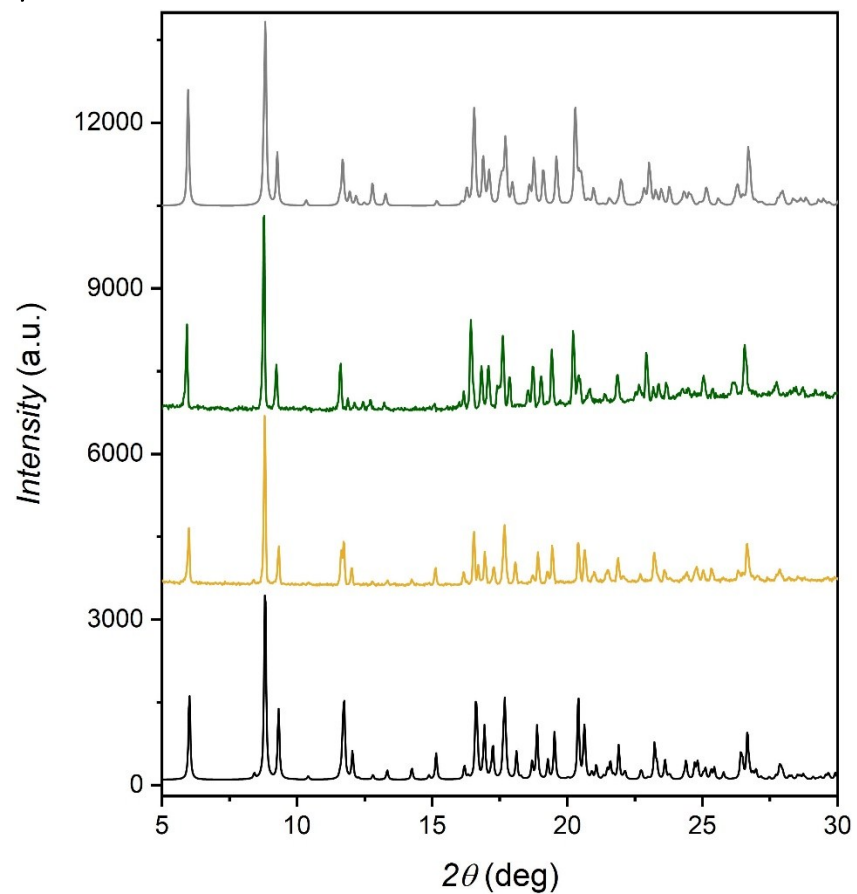

**Figure S5.** Comparison of the PXRD pattern simulated for single crystals of **1Re** (black line), experimental data obtained for **1Re** (yellow line), experimental data for **1** (green line) and simulated pattern for single crystals of **1** (grey line).

#### 4. Crystal structures

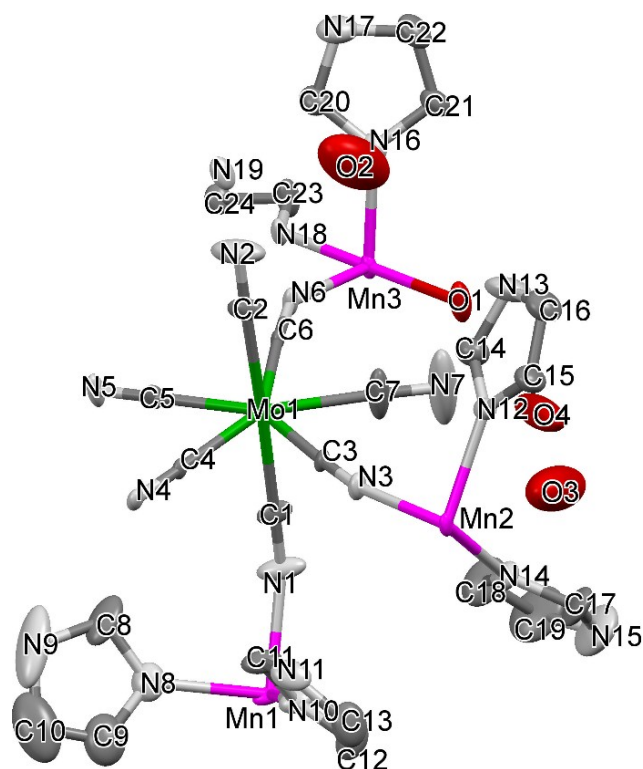

**Figure S6.** Asymmetric unit of compound **1** (hydrogen atoms were omitted for the sake of clarity). Thermal ellipsoids are depicted at the 30% probability level.

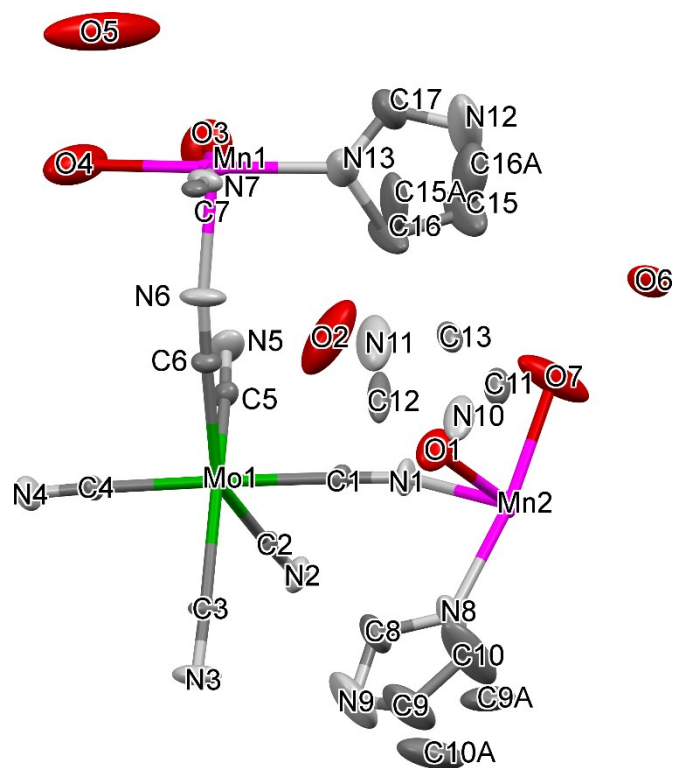

**Figure S7.** Asymmetric unit of compound **2** (hydrogen atoms were omitted for the sake of clarity). Thermal ellipsoids are depicted at the 50% probability level.

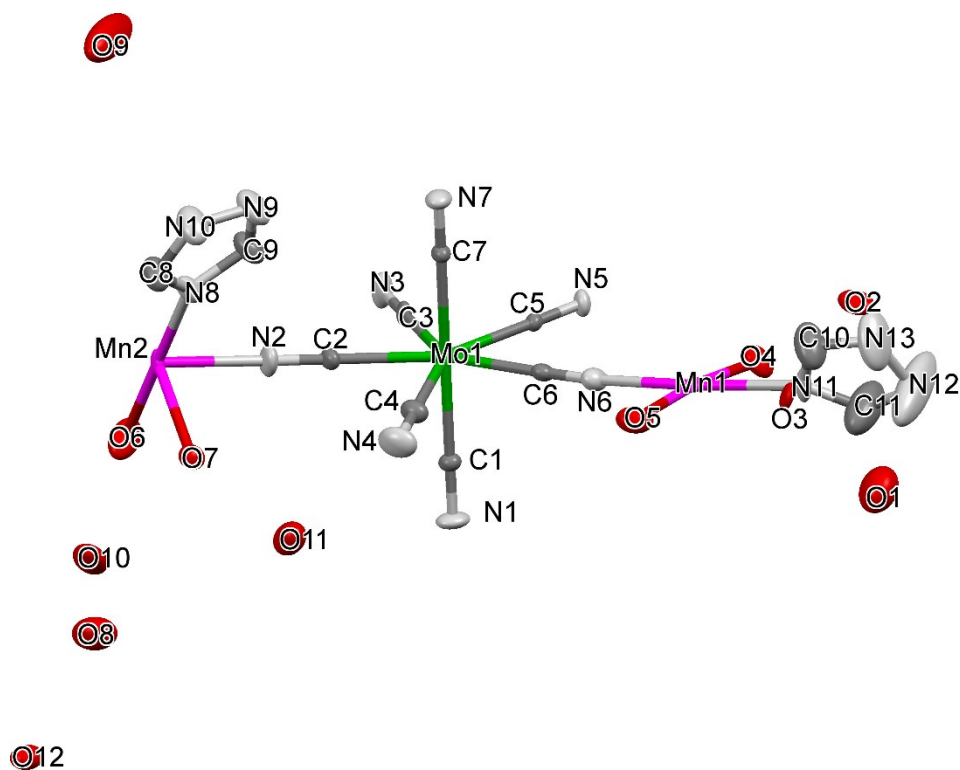

**Figure S8.** Asymmetric unit of compound **3** (hydrogen atoms were omitted for the sake of clarity). Thermal ellipsoids are depicted at the 50% probability level.

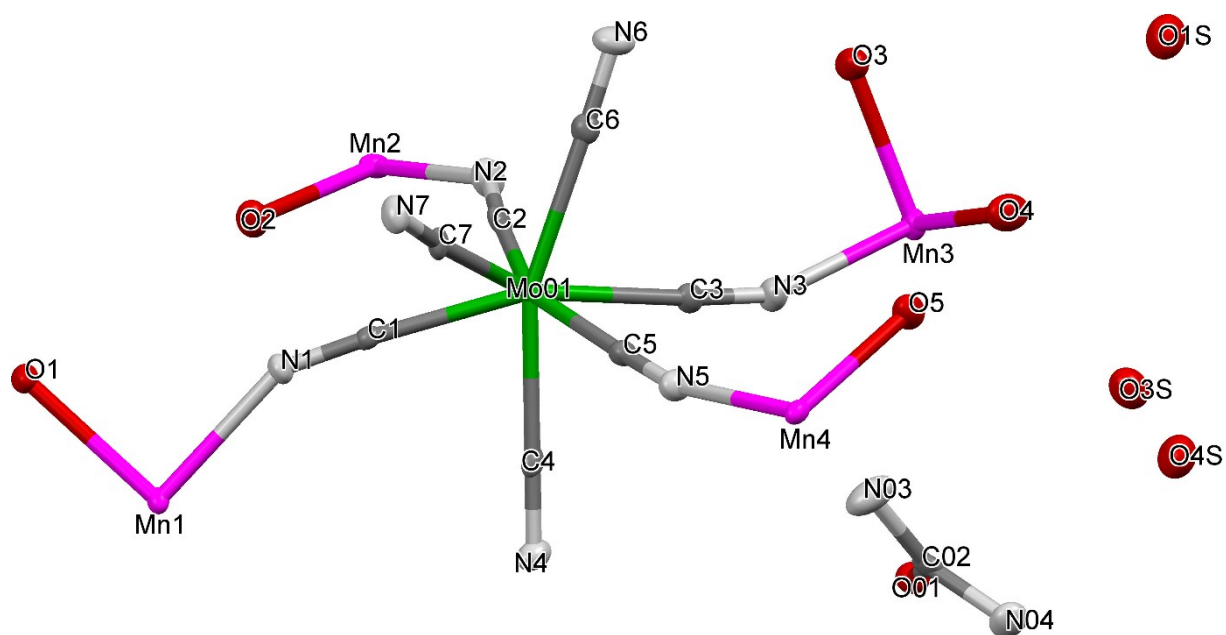

**Figure S9.** Asymmetric unit of compound **4** (hydrogen atoms were omitted for the sake of clarity). Thermal ellipsoids are depicted at the 50% probability level.



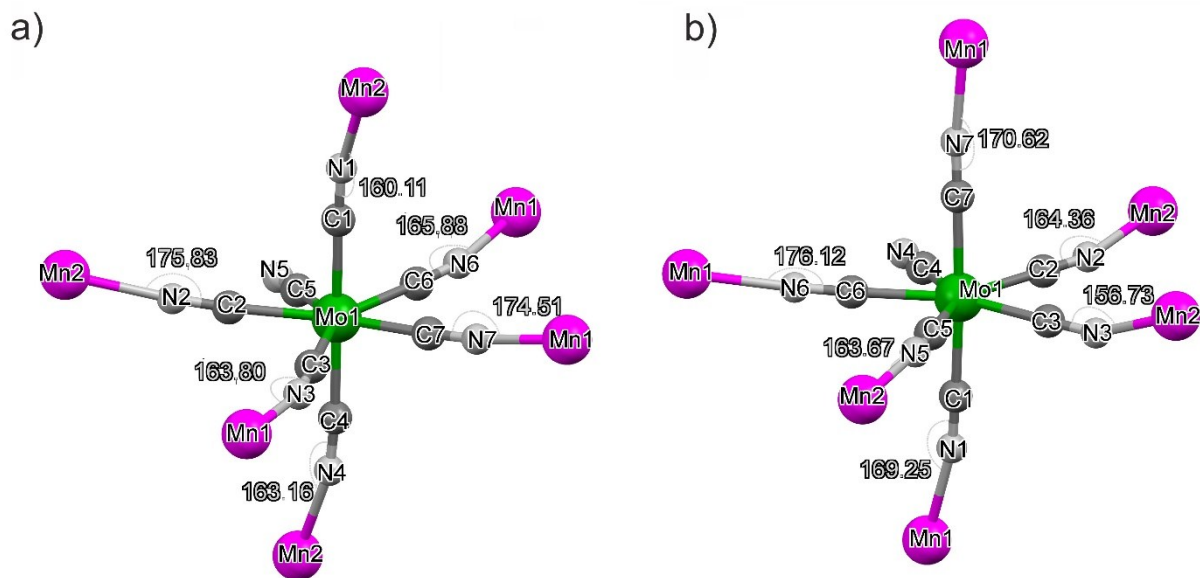

**Figure S10.** Coordination bridges and Mn-N-C angles in compounds **2** (a) and **3** (b).

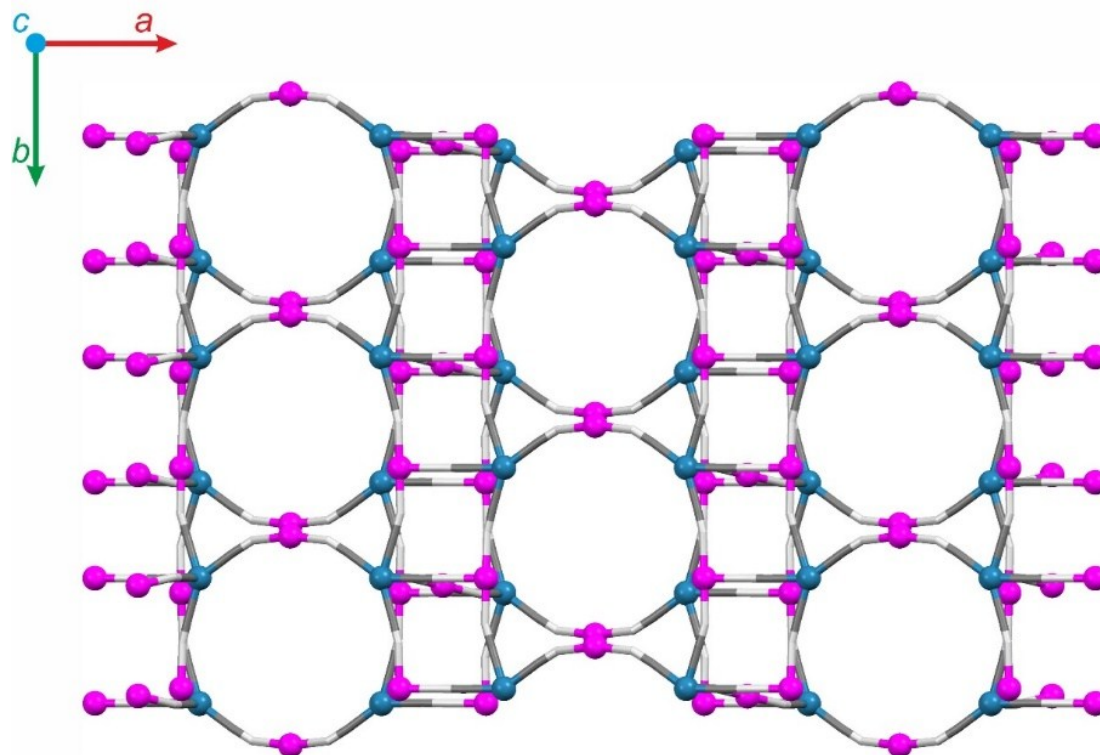

**Figure S11.** Coordination skeleton of compound **1Re** (blue – rhenium, magenta – manganese) viewed down the *c* axis.



**Table S1.** Crystallographic data and refinement parameters for compounds **1-4** and **1Re**.<sup>a</sup>

|                                                     | <b>1</b>                                                                                       | <b>1Re</b>                                                                                     |
|-----------------------------------------------------|------------------------------------------------------------------------------------------------|------------------------------------------------------------------------------------------------|
| Formula                                             | C <sub>47</sub> H <sub>42</sub> Mn <sub>4</sub> Mo <sub>2</sub> N <sub>36</sub> O <sub>7</sub> | C <sub>47</sub> H <sub>40</sub> Mn <sub>4</sub> N <sub>36</sub> O <sub>7</sub> Re <sub>2</sub> |
| FW (g·mol <sup>-1</sup> )                           | 1634.80                                                                                        | 1815.32                                                                                        |
| Temperature (K)                                     | 120(2)                                                                                         | 120(2)                                                                                         |
| Crystal system                                      | Monoclinic                                                                                     | Monoclinic                                                                                     |
| Space group                                         | C2/c                                                                                           | C2/c                                                                                           |
| a (Å)                                               | 32.2372(9)                                                                                     | 32.116(15)                                                                                     |
| b (Å)                                               | 10.7266(3)                                                                                     | 10.630(5)                                                                                      |
| c (Å)                                               | 21.8215(6)                                                                                     | 21.932(14)                                                                                     |
| β (°)                                               | 113.426(1)                                                                                     | 113.96(2)                                                                                      |
| V (Å <sup>3</sup> )                                 | 6931.5(3)                                                                                      | 6842(6)                                                                                        |
| Z                                                   | 4                                                                                              | 4                                                                                              |
| ρ <sub>calc</sub> (g·cm <sup>-3</sup> )             | 1.567                                                                                          | 1.762                                                                                          |
| Abs. coeff (mm <sup>-1</sup> )                      | 1.130                                                                                          | 4.313                                                                                          |
| F(000)                                              | 3264                                                                                           | 3528                                                                                           |
| Crystal size (mm)                                   | 0.20x0.05x0.03                                                                                 | 0.38x0.08x0.06                                                                                 |
| ϑ range (°)                                         | 2.67-25.42                                                                                     | 2.71-26.79                                                                                     |
| Reflections collected                               | 32259                                                                                          | 33190                                                                                          |
| R <sub>int</sub>                                    | 0.0688                                                                                         | 0.034                                                                                          |
| Parameters/restraints                               | 448/98                                                                                         | 449/98                                                                                         |
| GOF on F <sup>2</sup>                               | 1.041                                                                                          | 1.221                                                                                          |
| R <sub>1</sub> (refl. with I > 2σ(I))               | 0.0599                                                                                         | 0.0481                                                                                         |
| wR <sub>2</sub> (all reflections)                   | 0.1387                                                                                         | 0.1164                                                                                         |
| Largest diff. peak and hole<br>(e·Å <sup>-3</sup> ) | 1.171/-0.837                                                                                   | 3.29/-1.93                                                                                     |
| S <sub>PBPY</sub>                                   | 0.129                                                                                          | 0.116                                                                                          |
| S <sub>CTPR</sub>                                   | 5.212                                                                                          | 5.488                                                                                          |
| S <sub>COC</sub>                                    | 6.984                                                                                          | 7.159                                                                                          |

<sup>a</sup> S<sub>PBPY</sub>, S<sub>CTPR</sub>, S<sub>COC</sub> - shape measure relative to the pentagonal bipyramid (PBPY), capped trigonal prism (CTPR) and capped octahedron (COC). When the shape measure parameter equals zero, the geometry coincides with the idealized one.

**Table S1 (continued).** Crystallographic data and refinement parameters for compounds **1-4** and **1Re**.

|                                                  | <b>2</b>                                                           | <b>3</b>                                                                                  | <b>4</b>                                                                       |
|--------------------------------------------------|--------------------------------------------------------------------|-------------------------------------------------------------------------------------------|--------------------------------------------------------------------------------|
| Formula                                          | C <sub>14.5</sub> Mn <sub>2</sub> MoN <sub>12</sub> O <sub>6</sub> | C <sub>10.40</sub> H <sub>11</sub> Mn <sub>2</sub> MoN <sub>12.10</sub> O <sub>9.90</sub> | C <sub>8</sub> H <sub>20</sub> Mn <sub>2</sub> MoN <sub>9</sub> O <sub>9</sub> |
| FW (g·mol <sup>-1</sup> )                        | 644.08                                                             | 669.73                                                                                    | 592.15                                                                         |
| Temperature (K)                                  | 120(2)                                                             | 120(2)                                                                                    | 150(2)                                                                         |
| Crystal system                                   | Triclinic                                                          | Triclinic                                                                                 | Triclinic                                                                      |
| Space group                                      | $P\bar{1}$                                                         | $P\bar{1}$                                                                                | $P\bar{1}$                                                                     |
| a (Å)                                            | 10.6308(7)                                                         | 10.5826(2)                                                                                | 7.239(5)                                                                       |
| b (Å)                                            | 10.8192(7)                                                         | 10.9297(2)                                                                                | 12.039(5)                                                                      |
| c (Å)                                            | 11.8287(8)                                                         | 12.3540(3)                                                                                | 12.344(5)                                                                      |
| $\alpha$ (°)                                     | 70.190(3)                                                          | 67.655(1)                                                                                 | 80.062(5)                                                                      |
| $\beta$ (°)                                      | 77.920(3)                                                          | 78.167(1)                                                                                 | 89.517(5)                                                                      |
| $\gamma$ (°)                                     | 88.094(3)                                                          | 86.350(1)                                                                                 | 89.216(5)                                                                      |
| V (Å <sup>3</sup> )                              | 1250.59(15)                                                        | 1293.38(5)                                                                                | 1059.5(10)                                                                     |
| Z                                                | 2                                                                  | 2                                                                                         | 2                                                                              |
| $\rho_{\text{calc}}$ (g·cm <sup>3</sup> )        | 1.710                                                              | 1.720                                                                                     | 1.856                                                                          |
| Abs. coeff (mm <sup>-1</sup> )                   | 1.541                                                              | 1.504                                                                                     | 1.815                                                                          |
| $F(000)$                                         | 638                                                                | 659                                                                                       | 590                                                                            |
| Crystal size (mm)                                | 0.22x0.12x0.05                                                     | 0.30x0.30x0.20                                                                            | 0.13x0.06x0.05                                                                 |
| $\vartheta$ range (°)                            | 2.98-27.16                                                         | 2.93-27.49                                                                                | 1.67-26.66                                                                     |
| Reflections collected                            | 20013                                                              | 19094                                                                                     | 11350                                                                          |
| $R_{\text{int}}$                                 | 0.035                                                              | 0.019                                                                                     | 0.045                                                                          |
| Parameters/restraints                            | 388/19                                                             | 377/49                                                                                    | 348/1                                                                          |
| GOF on $F^2$                                     | 1.127                                                              | 1.062                                                                                     | 1.028                                                                          |
| $R_1$ (refl. with $I > 2\sigma(I)$ )             | 0.0551                                                             | 0.0332                                                                                    | 0.0316                                                                         |
| $wR_2$ (all reflections)                         | 0.1372                                                             | 0.0837                                                                                    | 0.0735                                                                         |
| Largest diff. peak and hole (e·Å <sup>-3</sup> ) | 2.50/-1.39                                                         | 1.93/-0.84                                                                                | 0.50/-0.49                                                                     |
| $S_{\text{PBPY}}$                                | 0.665                                                              | 0.176                                                                                     | 6.660                                                                          |
| $S_{\text{CTPR}}$                                | 4.084                                                              | 5.730                                                                                     | 0.650                                                                          |
| $S_{\text{COC}}$                                 | 5.650                                                              | 7.371                                                                                     | 0.890                                                                          |

<sup>a</sup>  $S_{\text{PBPY}}$ ,  $S_{\text{CTPR}}$ ,  $S_{\text{COC}}$  - shape measure relative to the pentagonal bipyramid (PBPY), capped trigonal prism (CTPR) and capped octahedron (COC). When the shape measure parameter equals zero, the geometry coincides with the idealized one.

**Table S2.** Important bond distances (Å) and angles (°) for compounds **1-4** and **1Re** (grey fields denote axial cyanide bridges).

| <b>Bond</b> | <b>1</b> | <b>Angle</b> | <b>1</b> |
|-------------|----------|--------------|----------|
| Mn1-N1      | 2.224(6) | Mn1-N1-C1    | 151.9(6) |
| Mn2-N3      | 2.192(5) | Mn2-N3-C3    | 166.7(5) |
| Mn2-N4      | 2.139(5) | Mn2-N4-C4    | 177.9(4) |
| Mn2-N5      | 2.193(5) | Mn2-N5-C5    | 162.7(5) |
| Mn3-N6      | 2.225(5) | Mn3-N6-C6    | 149.8(4) |
|             | <b>2</b> |              | <b>2</b> |
| Mn2-N1      | 2.185(5) | Mn2-N1-C1    | 160.1(5) |
| Mn2-N2      | 2.211(5) | Mn2-N2-C2    | 175.8(5) |
| Mn1-N3      | 2.166(5) | Mn1-N3-C3    | 163.8(5) |
| Mn2-N4      | 2.206(5) | Mn2-N4-C4    | 163.2(5) |
| Mn1-N6      | 2.180(5) | Mn1-N6-C6    | 165.9(5) |
| Mn1-N7      | 2.177(5) | Mn1-N7-C7    | 174.5(5) |
|             | <b>3</b> |              | <b>3</b> |
| Mn1-N1      | 2.212(3) | Mn1-N1-C1    | 169.3(3) |
| Mn2-N2      | 2.181(3) | Mn2-N2-C2    | 164.4(3) |
| Mn2-N3      | 2.190(3) | Mn2-N3-C3    | 156.7(3) |
| Mn2-N5      | 2.179(2) | Mn2-N5-C5    | 163.7(2) |
| Mn1-N6      | 2.198(3) | Mn1-N6-C6    | 176.1(2) |
| Mn1-N7      | 2.175(2) | Mn1-N7-C7    | 170.6(3) |

**Table S2 (continued).** Important bond distances (Å) and angles (°) for compounds **1-4** and **1Re** (grey fields denote axial cyanide bridges).

| <b>Bond</b> | <b>4</b>   | <b>Angle</b> | <b>4</b>   |
|-------------|------------|--------------|------------|
| Mn1-N1      | 2.245(3)   | Mn1-N1-C1    | 152.6(2)   |
| Mn2-N2      | 2.218(3)   | Mn2-N2-C2    | 142.2(3)   |
| Mn3-N3      | 2.195(3)   | Mn3-N3-C3    | 158.4(3)   |
| Mn4-N4      | 2.231(3)   | Mn4-N4-C4    | 154.1(3)   |
| Mn4-N5      | 2.209(3)   | Mn4-N5-C5    | 166.9(3)   |
| Mn2-N6      | 2.195(3)   | Mn2-N6-C6    | 149.8(3)   |
| Mn1-N7      | 2.173(3)   | Mn1-N7-C7    | 157.3(3)   |
|             | <b>1Re</b> |              | <b>1Re</b> |
| Mn1-N1      | 2.151(6)   | Mn1-N1-C1    | 178.9(7)   |
| Mn1-N2      | 2.203(8)   | Mn1-N2-C2    | 162.2(7)   |
| Mn3-N3      | 2.253(7)   | Mn3-N3-C3    | 149.3(7)   |
| Mn2-N6      | 2.236(10)  | Mn2-N6-C6    | 151.1(8)   |
| Mn1-N7      | 2.207(7)   | Mn1-N7-C7    | 166.2(7)   |

## 5. Magnetic properties

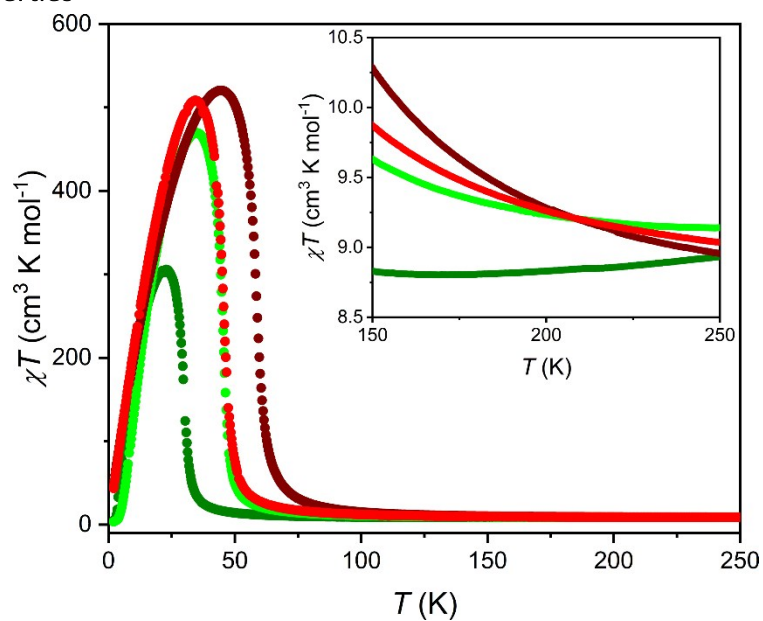

**Figure S12.**  $\chi T$  versus  $T$  plots for compounds **1** (dark green), **2** (light green), **3** (red) and **4** (dark red) at  $H_{DC} = 1000$  Oe. Inset contains a close-up of the 150-250 K region.

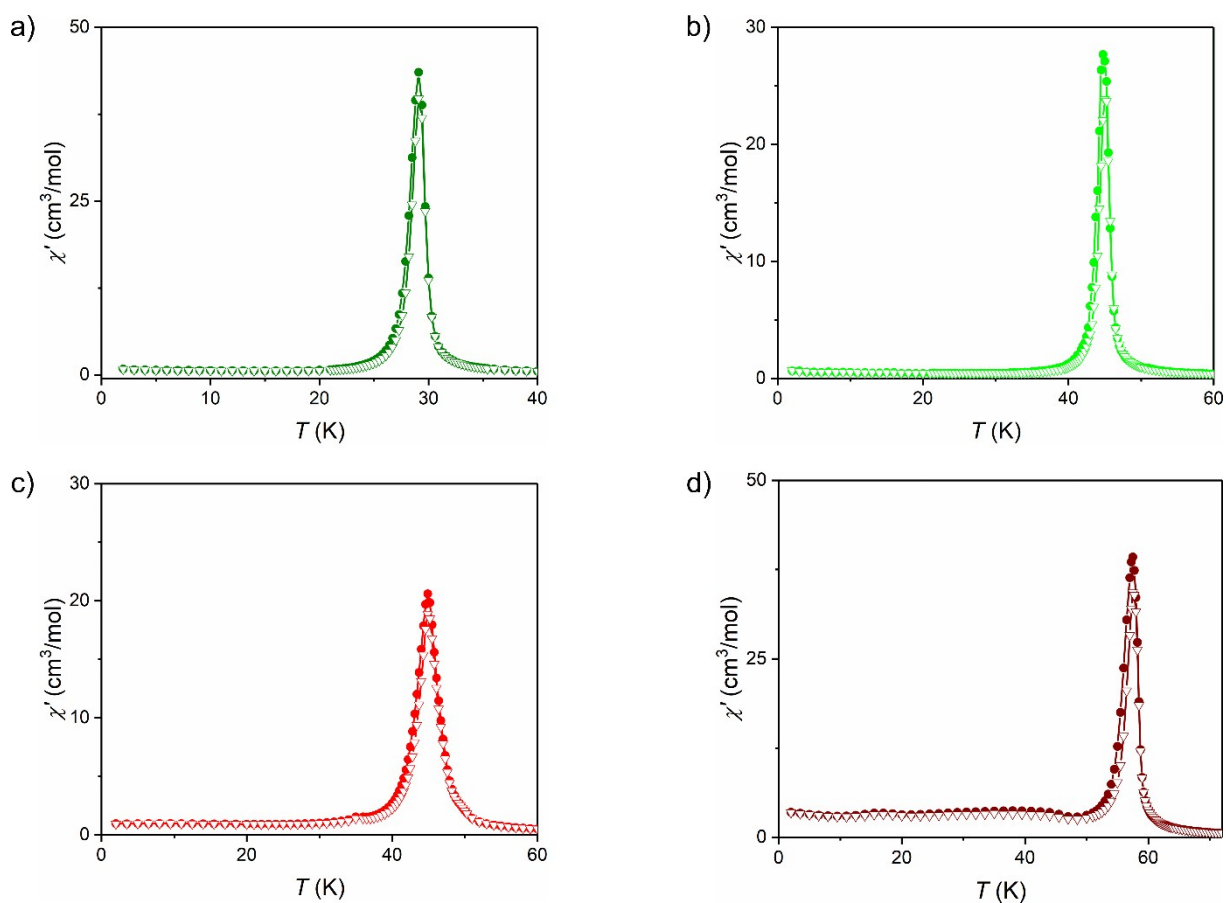

**Figure S13.**  $\chi T$  versus  $T$  plots for compounds **1-4** at  $H_{AC} = 1$  Oe and no DC field (a-d respectively; full circles – 70 Hz, open triangles – 700 Hz).

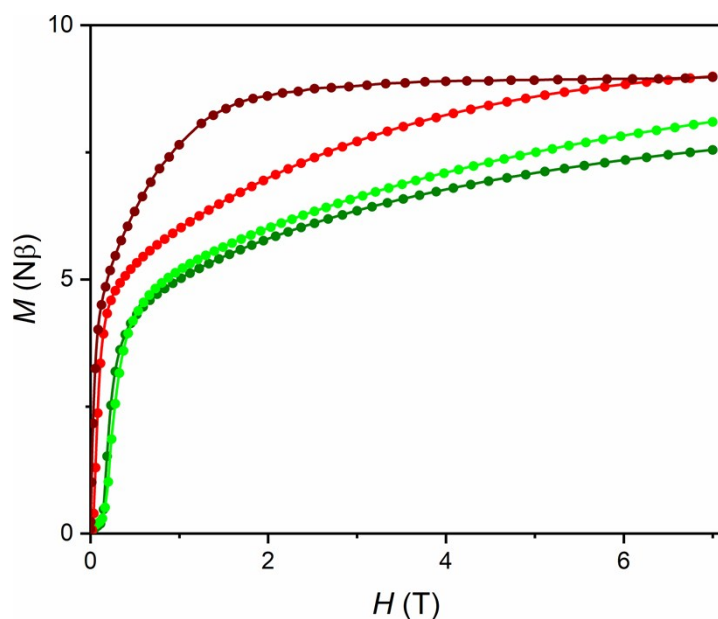

**Figure S14.**  $M$  versus  $H$  plots in the 0-7 T range for compounds **1** (dark green), **2** (light green), **3** (red) and **4** (dark red) at  $T = 1.8$  K. Solid lines are guides for an eye.

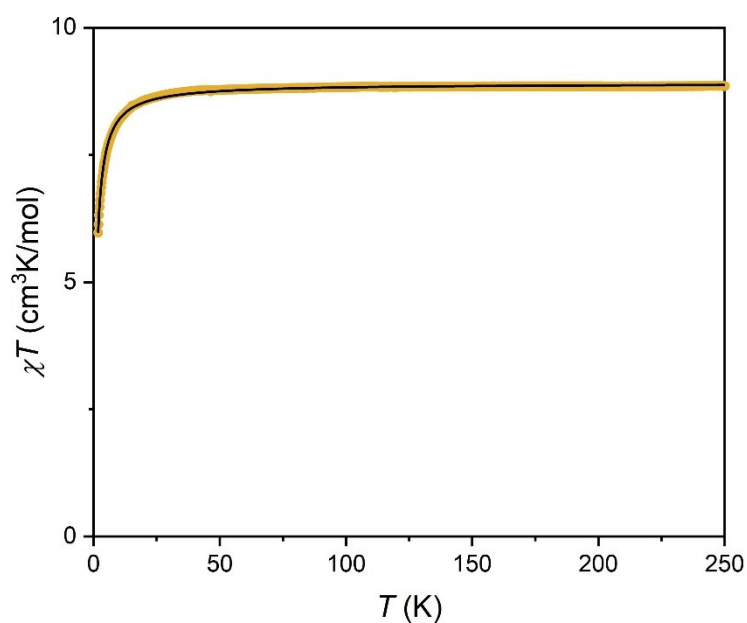

**Figure S15.**  $\chi T$  versus  $T$  plot at  $H = 0.1$  T (left) for **1Re**. Yellow points are experimental values and solid line represents the best fit to the mean-field approximation (see details in the manuscript).

## References

- [S1] a) G. Sheldrick, *Acta Crystallogr., Sect. A: Found. Crystallogr.*, **2008**, *64*, 112 b) G. Sheldrick, *Acta Crystallogr., Sect. C: Struct. Chem.*, **2015**, *71*, 3 c) O. V. Dolomanov, L. J. Bourhis, R. J. Gildea, J. A. K. Howard, H. Puschmann, *J. Appl. Cryst.*, **2009**, *42*, 339
- [S2] C. F. Macrae, I. J. Bruno, J. A. Chisholm, P. R. Edgington, P. McCabe, E. Pidcock, L. Rodriguez-Monge, R. Taylor, J. van de Streek, P. A. Wood, *J. Appl. Cryst.*, **2008**, *41*, 466-470
